# Supplementary material for: Database and Statistical Analyses of Transcription Factor Binding Sites in the Non-Coding Control Region of JC Virus
Source: Viruses. 2021 Nov 19;13(11):2314. doi: 10.3390/v13112314 (PMC8620444; doi:10.3390/v13112314)
Supplement: Supplementary file 1 [file viruses-13-02314-s001.zip]

Archive with 5 entries (5 files):
- Supplementary Dataset S1.xlsx
- Supplementary Dataset S2.xlsx
- Supplementary Dataset S3.xlsx
- Supplementary Dataset S4.xlsx
- Supplementary Figure S1.pdf
