# Supplementary material for: Database and Statistical Analyses of Transcription Factor Binding Sites in the Non-Coding Control Region of JC Virus
Source: Viruses. 2021 Nov 19;13(11):2314. doi: 10.3390/v13112314 (PMC8620444; doi:10.3390/v13112314)
Supplement: Supplementary file 1 [file viruses-13-02314-s001.zip › Supplementary Dataset S1.xlsx]

## Sheet: Supplementary Dataset S1_Legend
Database and statistical analyses of transcription factor binding sites in the non-coding control region of JC virus
Kazuo Nakamichi and Toshio Shimokawa
Supplementary Dataset S1. Summary of JCV DNA sequences that were downloaded from GenBank and contained the NCCR.
Of the 2337 sequences hit by the keyword search, 1024 had NCCR.
If there were multiple identical sequences as a result of the alignment, the representative sequences were marked as "Representative" and the other sequences were marked with the accession numbers of the same sequences.
In order to compare sequences more accurately by computer simulation, the presence or absence of 5' and 3' nucleotide positions 1-10 (5' 10-bp Tag) and 258-267 (3' 10-bp Tag) in CY strains and the integrity of the nucleotide composition were checked.
NCCR sequences that were identical, had no ends, or had anything other than ATGC were excluded from the subsequent analyses.

## Sheet: Supplementary Dataset S1_Data
Consecutive number	Accession number	Identical sequence	5' 10-bp Tag	3' 10-bp Tag	Nucleotide composition
1	AB699081	None	Intact	Intact	ATGC
2	AB699084	None	Intact	Intact	ATGC
3	AB699080	None	Intact	Intact	ATGC
4	AB699082	None	Intact	Intact	ATGC
5	AB699071	None	Intact	Intact	ATGC
6	AB699077	None	Intact	Intact	ATGC
7	AB699079	None	Intact	Intact	ATGC
8	AB699087	None	Intact	Intact	ATGC
9	AB699085	None	Intact	Intact	ATGC
10	AB699073	None	Intact	Intact	ATGC
11	AB699076	None	Intact	Intact	ATGC
12	AB183708	None	Intact	Intact	ATGC
13	AB699075	None	Intact	Intact	ATGC
14	AB699072	None	Intact	Intact	ATGC
15	AB699062	None	Intact	Intact	ATGC
16	AB699061	None	Intact	Intact	ATGC
17	AB699060	None	Intact	Intact	ATGC
18	AB699058	None	Intact	Intact	ATGC
19	AB699057	None	Intact	Intact	ATGC
20	AB699064	None	Intact	Intact	ATGC
21	AB699067	None	Intact	Intact	ATGC
22	AB699068	None	Intact	Intact	ATGC
23	AB699052	None	Intact	Intact	ATGC
24	AB699053	None	Intact	Intact	ATGC
25	AB699051	None	Intact	Intact	ATGC
26	AB699044	None	Intact	Intact	ATGC
27	AB699045	None	Intact	Intact	ATGC
28	AB699043	None	Intact	Intact	ATGC
29	AB699042	None	Intact	Intact	ATGC
30	AB699041	None	Intact	Intact	ATGC
31	AB699050	None	Intact	Intact	ATGC
32	AB699047	None	Intact	Intact	ATGC
33	HF955449	None	Intact	Intact	ATGC
34	HF955450	None	Intact	Intact	ATGC
35	EU747354	None	Intact	Intact	ATGC
36	EU747352	None	Intact	Intact	ATGC
37	EU747351	None	Intact	Intact	ATGC
38	HF955448	None	Intact	Intact	ATGC
39	HF955446	None	Intact	Intact	ATGC
40	HF955439	None	Intact	Intact	ATGC
41	HF955438	None	Intact	Intact	ATGC
42	HF955447	None	Intact	Intact	ATGC
43	AB003027	None	Intact	Intact	ATGC
44	AB003029	None	Intact	Intact	ATGC
45	AB003030	None	Intact	Intact	ATGC
46	AB006366	None	Intact	Intact	ATGC
47	AB006367	None	Intact	Intact	ATGC
48	AB006369	None	Intact	Intact	ATGC
49	AB008765	None	Intact	Intact	ATGC
50	AB127342	None	Intact	Intact	ATGC
51	AB127343	None	Intact	Intact	ATGC
52	AB127352	None	Intact	Intact	ATGC
53	AB127353	None	Intact	Intact	ATGC
54	AF015538	None	Intact	Intact	ATGC
55	AF044714	None	Intact	Intact	ATGC
56	AF044715	None	Intact	Intact	ATGC
57	AF044716	None	Intact	Intact	ATGC
58	AF044717	None	Intact	Intact	ATGC
59	AF044718	None	Intact	Intact	ATGC
60	AF047456	None	Intact	Intact	ATGC
61	AF048698	None	Intact	Intact	ATGC
62	AF064547	None	Intact	Intact	ATGC
63	AF203609	None	Intact	Intact	ATGC
64	AF203611	None	Intact	Intact	ATGC
65	AF203612	None	Intact	Intact	ATGC
66	AF218438	None	Intact	Intact	ATGC
67	AF218440	None	Intact	Intact	ATGC
68	AF218441	None	Intact	Intact	ATGC
69	AF218442	None	Intact	Intact	ATGC
70	AF218443	None	Intact	Intact	ATGC
71	AF218444	None	Intact	Intact	ATGC
72	AF258303	None	Intact	Intact	ATGC
73	AF258304	None	Intact	Intact	ATGC
74	AF258305	None	Intact	Intact	ATGC
75	AF258306	None	Intact	Intact	ATGC
76	AF258307	None	Intact	Intact	ATGC
77	AF258308	None	Intact	Intact	ATGC
78	AF258310	None	Intact	Intact	ATGC
79	AF258311	None	Intact	Intact	ATGC
80	AF258312	None	Intact	Intact	ATGC
81	AF258313	None	Intact	Intact	ATGC
82	AF258314	None	Intact	Intact	ATGC
83	AF258315	None	Intact	Intact	ATGC
84	AF300958	None	Intact	Intact	ATGC
85	AF300959	None	Intact	Intact	ATGC
86	AF300965	None	Intact	Intact	ATGC
87	AF320317	None	Intact	Intact	ATGC
88	AF320318	None	Intact	Intact	ATGC
89	AF352161	None	Intact	Intact	ATGC
90	AF532778	None	Intact	Intact	ATGC
91	AF532779	None	Intact	Intact	ATGC
92	AF533308	None	Intact	Intact	ATGC
93	AF533309	None	Intact	Intact	ATGC
94	AF533310	None	Intact	Intact	ATGC
95	AF533311	None	Intact	Intact	ATGC
96	AF533312	None	Intact	Intact	ATGC
97	AY050521	None	Intact	Intact	ATGC
98	AY083211	None	Intact	Intact	ATGC
99	AY386378	None	Intact	Intact	ATGC
100	AY536239	None	Intact	Intact	ATGC
101	AY536240	None	Intact	Intact	ATGC
102	AY536241	None	Intact	Intact	ATGC
103	AY536242	None	Intact	Intact	ATGC
104	AY536243	None	Intact	Intact	ATGC
105	D49991	None	Intact	Intact	ATGC
106	D49992	None	Intact	Intact	ATGC
107	D49994	None	Intact	Intact	ATGC
108	D49996	None	Intact	Intact	ATGC
109	D49998	None	Intact	Intact	ATGC
110	D61696	None	Intact	Intact	ATGC
111	D61697	None	Intact	Intact	ATGC
112	D61699	None	Intact	Intact	ATGC
113	D61700	None	Intact	Intact	ATGC
114	D61702	None	Intact	Intact	ATGC
115	DQ104099	None	Intact	Intact	ATGC
116	DQ114930	None	Intact	Intact	ATGC
117	DQ114931	None	Intact	Intact	ATGC
118	DQ114932	None	Intact	Intact	ATGC
119	DQ114933	None	Intact	Intact	ATGC
120	DQ114934	None	Intact	Intact	ATGC
121	DQ114935	None	Intact	Intact	ATGC
122	DQ114936	None	Intact	Intact	ATGC
123	DQ114938	None	Intact	Intact	ATGC
124	DQ114940	None	Intact	Intact	ATGC
125	DQ114941	None	Intact	Intact	ATGC
126	DQ250720	None	Intact	Intact	ATGC
127	DQ250721	None	Intact	Intact	ATGC
128	DQ250722	None	Intact	Intact	ATGC
129	DQ250723	None	Intact	Intact	ATGC
130	DQ250724	None	Intact	Intact	ATGC
131	DQ250725	None	Intact	Intact	ATGC
132	DQ250726	None	Intact	Intact	ATGC
133	DQ250728	None	Intact	Intact	ATGC
134	DQ250729	None	Intact	Intact	ATGC
135	HF955440	None	Intact	Intact	ATGC
136	HF955441	None	Intact	Intact	ATGC
137	HF955445	None	Intact	Intact	ATGC
138	HM038524	None	Intact	Intact	ATGC
139	HM038526	None	Intact	Intact	ATGC
140	HM038527	None	Intact	Intact	ATGC
141	HM038528	None	Intact	Intact	ATGC
142	HM038529	None	Intact	Intact	ATGC
143	HM038530	None	Intact	Intact	ATGC
144	HM038531	None	Intact	Intact	ATGC
145	HM038532	None	Intact	Intact	ATGC
146	HM038533	None	Intact	Intact	ATGC
147	D26584	None	Intact	Intact	ATGC
148	D26585	None	Intact	Intact	ATGC
149	D26588	None	Intact	Intact	ATGC
150	JF424876	None	Intact	Intact	ATGC
151	JF425839	None	Intact	Intact	ATGC
152	JF425863	None	Intact	Intact	ATGC
153	JF425871	None	Intact	Intact	ATGC
154	JF425873	None	Intact	Intact	ATGC
155	JF426031	None	Intact	Intact	ATGC
156	JF426069	None	Intact	Intact	ATGC
157	U73178	None	Intact	Intact	ATGC
158	D10286	None	Intact	Intact	ATGC
159	D00807	None	Intact	Intact	ATGC
160	D10283	None	Intact	Intact	ATGC
161	D00806	None	Intact	Intact	ATGC
162	D10284	None	Intact	Intact	ATGC
163	D10285	None	Intact	Intact	ATGC
164	D12574	None	Intact	Intact	ATGC
165	D12575	None	Intact	Intact	ATGC
166	D12576	None	Intact	Intact	ATGC
167	D12577	None	Intact	Intact	ATGC
168	D12578	None	Intact	Intact	ATGC
169	JF426109	None	Intact	Intact	ATGC
170	D49997	None	Intact	Intact	ATGC
171	HM038525	None	Intact	Intact	ATGC
172	DQ250719	None	Intact	Intact	ATGC
173	AF533313	None	Intact	Intact	ATGC
174	AF218439	None	Intact	Intact	ATGC
175	AB699089	None	Intact	Intact	ATGC
176	AF004349	None	Intact	Intact	ATGC
177	AF004350	None	Intact	Intact	ATGC
178	AF030116	None	Intact	Missing	ATGC
179	AF030117	None	Intact	Missing	ATGC
180	AF030118	None	Intact	Missing	ATGC
181	AF030119	None	Intact	Missing	ATGC
182	AF030120	None	Intact	Missing	ATGC
183	AF030121	None	Intact	Missing	ATGC
184	AF030123	None	Intact	Missing	ATGC
185	AF030124	None	Intact	Missing	ATGC
186	AF030125	None	Intact	Missing	ATGC
187	AF030126	None	Intact	Missing	ATGC
188	AF030128	None	Intact	Missing	ATGC
189	JF425618	None	Intact	Missing	ATGC
190	JF425619	None	Intact	Missing	ATGC
191	JF425675	None	Intact	Missing	ATGC
192	JF425684	None	Intact	Missing	ATGC
193	JF425715	None	Intact	Missing	ATGC
194	JF425758	None	Intact	Missing	ATGC
195	JF425809	None	Intact	Missing	ATGC
196	JF426073	None	Intact	Missing	ATGC
197	JF426127	None	Intact	Missing	ATGC
198	D00801	Representative	Intact	Intact	ATGC
199	AB038250	D00801	Intact	Intact	ATGC
200	AB699038	Representative	Intact	Intact	ATGC
201	AB699037	AB699038	Intact	Intact	ATGC
202	AB699046	Representative	Intact	Intact	ATGC
203	AB699040	AB699046	Intact	Intact	ATGC
204	AB699049	Representative	Intact	Intact	ATGC
205	AB699048	AB699049	Intact	Intact	ATGC
206	AB699055	Representative	Intact	Intact	ATGC
207	AB699054	AB699055	Intact	Intact	ATGC
208	AB699059	Representative	Intact	Intact	ATGC
209	AB699056	AB699059	Intact	Intact	ATGC
210	AB699065	Representative	Intact	Intact	ATGC
211	AB699063	AB699065	Intact	Intact	ATGC
212	AB699069	Representative	Intact	Intact	ATGC
213	AB699066	AB699069	Intact	Intact	ATGC
214	AB699078	Representative	Intact	Intact	ATGC
215	AB699070	AB699078	Intact	Intact	ATGC
216	AB699083	Representative	Intact	Intact	ATGC
217	AB699074	AB699083	Intact	Intact	ATGC
218	AB699088	Representative	Intact	Intact	ATGC
219	AB699086	AB699088	Intact	Intact	ATGC
220	AF203614	Representative	Intact	Intact	ATGC
221	AF203613	AF203614	Intact	Intact	ATGC
222	AF203617	Representative	Intact	Intact	ATGC
223	AF203615	AF203617	Intact	Intact	ATGC
224	AF300966	Representative	Intact	Intact	ATGC
225	AF320319	AF300966	Intact	Intact	ATGC
226	AY376829	Representative	Intact	Intact	ATGC
227	AY342299	AY376829	Intact	Intact	ATGC
228	AY364314	Representative	Intact	Intact	ATGC
229	AY366359	AY364314	Intact	Intact	ATGC
230	AY382184	Representative	Intact	Intact	ATGC
231	AY378085	AY382184	Intact	Intact	ATGC
232	AF300956	Representative	Intact	Intact	ATGC
233	D49990	AF300956	Intact	Intact	ATGC
234	AB038254	Representative	Intact	Intact	ATGC
235	D26586	AB038254	Intact	Intact	ATGC
236	AB038255	Representative	Intact	Intact	ATGC
237	D26587	AB038255	Intact	Intact	ATGC
238	D61701	Representative	Intact	Intact	ATGC
239	HF955442	HF955442	Intact	Intact	ATGC
240	DQ114939	Representative	Intact	Intact	ATGC
241	DQ114937	DQ114939	Intact	Intact	ATGC
242	FJ233070	Representative	Intact	Intact	ATGC
243	FJ233069	FJ233070	Intact	Intact	ATGC
244	FJ233068	FJ233070	Intact	Intact	ATGC
245	AB038252	Representative	Intact	Intact	ATGC
246	D49988	AB038252	Intact	Intact	ATGC
247	AF203610	AB038252	Intact	Intact	ATGC
248	AF354586	Representative	Intact	Missing	ATGC
249	AF354585	AF354586	Intact	Missing	ATGC
250	JF425750	Representative	Intact	Missing	ATGC
251	JF425738	JF425750	Intact	Missing	ATGC
252	JF426043	Representative	Intact	Intact	ATGC
253	JF426036	JF426043	Intact	Intact	ATGC
254	JF426035	JF426043	Intact	Intact	ATGC
255	JF426029	JF426043	Intact	Intact	ATGC
256	JF426032	JF426043	Intact	Intact	ATGC
257	JF426040	Representative	Intact	Intact	ATGC
258	JF426039	JF426040	Intact	Intact	ATGC
259	JF426038	JF426040	Intact	Intact	ATGC
260	JF426037	JF426040	Intact	Intact	ATGC
261	JF426030	JF426040	Intact	Intact	ATGC
262	D49995	Representative	Intact	Intact	ATGC
263	HF955444	D49995	Intact	Intact	ATGC
264	AF363834	D49995	Intact	Intact	ATGC
265	AF363833	D49995	Intact	Intact	ATGC
266	AF363832	D49995	Intact	Intact	ATGC
267	JF426045	Representative	Intact	Intact	ATGC
268	JF426044	JF426045	Intact	Intact	ATGC
269	JF426041	JF426045	Intact	Intact	ATGC
270	JF426034	JF426045	Intact	Intact	ATGC
271	JF426033	JF426045	Intact	Intact	ATGC
272	JF426028	JF426045	Intact	Intact	ATGC
273	JF426027	JF426045	Intact	Intact	ATGC
274	JF425597	Representative	Intact	Missing	ATGC
275	JF425590	JF425597	Intact	Missing	ATGC
276	JF425574	JF425597	Intact	Missing	ATGC
277	JF425573	JF425597	Intact	Missing	ATGC
278	JF425563	JF425597	Intact	Missing	ATGC
279	JF425562	JF425597	Intact	Missing	ATGC
280	JF425558	JF425597	Intact	Missing	ATGC
281	D49987	Representative	Intact	Intact	ATGC
282	AY349147	D49987	Intact	Intact	ATGC
283	AY356539	D49987	Intact	Intact	ATGC
284	AY373463	D49987	Intact	Intact	ATGC
285	AY376828	D49987	Intact	Intact	ATGC
286	AY378084	D49987	Intact	Intact	ATGC
287	AY378087	D49987	Intact	Intact	ATGC
288	AY382185	D49987	Intact	Intact	ATGC
289	AY382186	D49987	Intact	Intact	ATGC
290	AY386373	D49987	Intact	Intact	ATGC
291	AY386374	D49987	Intact	Intact	ATGC
292	AY386375	D49987	Intact	Intact	ATGC
293	AY386376	D49987	Intact	Intact	ATGC
294	AY386377	D49987	Intact	Intact	ATGC
295	AB038253	Representative	Intact	Intact	ATGC
296	D49989	AB038253	Intact	Intact	ATGC
297	D49993	AB038253	Intact	Intact	ATGC
298	AY382187	AB038253	Intact	Intact	ATGC
299	AY376831	AB038253	Intact	Intact	ATGC
300	AY376830	AB038253	Intact	Intact	ATGC
301	AY328376	AB038253	Intact	Intact	ATGC
302	AY378086	AB038253	Intact	Intact	ATGC
303	AY382188	AB038253	Intact	Intact	ATGC
304	JF425504	Representative	Intact	Intact	ATGC
305	JF425503	JF425504	Intact	Intact	ATGC
306	JF425502	JF425504	Intact	Intact	ATGC
307	JF425501	JF425504	Intact	Intact	ATGC
308	JF425500	JF425504	Intact	Intact	ATGC
309	JF425499	JF425504	Intact	Intact	ATGC
310	JF425498	JF425504	Intact	Intact	ATGC
311	JF425497	JF425504	Intact	Intact	ATGC
312	JF425496	JF425504	Intact	Intact	ATGC
313	JF425495	JF425504	Intact	Intact	ATGC
314	JF425494	JF425504	Intact	Intact	ATGC
315	JF425493	JF425504	Intact	Intact	ATGC
316	JF425492	JF425504	Intact	Intact	ATGC
317	JF425491	JF425504	Intact	Intact	ATGC
318	JF425490	JF425504	Intact	Intact	ATGC
319	JF425489	JF425504	Intact	Intact	ATGC
320	JF425488	JF425504	Intact	Intact	ATGC
321	JF425736	JF425504	Intact	Missing	ATGC
322	JF425737	JF425504	Intact	Missing	ATGC
323	JF425739	JF425504	Intact	Missing	ATGC
324	JF425740	JF425504	Intact	Missing	ATGC
325	JF425741	JF425504	Intact	Missing	ATGC
326	JF425742	JF425504	Intact	Missing	ATGC
327	JF425743	JF425504	Intact	Missing	ATGC
328	JF425744	JF425504	Intact	Missing	ATGC
329	JF425745	JF425504	Intact	Missing	ATGC
330	JF425746	JF425504	Intact	Missing	ATGC
331	JF425747	JF425504	Intact	Missing	ATGC
332	JF425748	JF425504	Intact	Missing	ATGC
333	JF425749	JF425504	Intact	Missing	ATGC
334	JF425751	JF425504	Intact	Missing	ATGC
335	JF425753	JF425504	Intact	Missing	ATGC
336	JF425754	JF425504	Intact	Missing	ATGC
337	JF425755	JF425504	Intact	Missing	ATGC
338	JF425756	JF425504	Intact	Missing	ATGC
339	JF425757	JF425504	Intact	Missing	ATGC
340	JF425955	Representative	Intact	Intact	ATGC
341	JF425935	JF425955	Intact	Intact	ATGC
342	JF425936	JF425955	Intact	Intact	ATGC
343	JF425937	JF425955	Intact	Intact	ATGC
344	JF425938	JF425955	Intact	Intact	ATGC
345	JF425939	JF425955	Intact	Intact	ATGC
346	JF425940	JF425955	Intact	Intact	ATGC
347	JF425941	JF425955	Intact	Intact	ATGC
348	JF425942	JF425955	Intact	Intact	ATGC
349	JF425943	JF425955	Intact	Intact	ATGC
350	JF425944	JF425955	Intact	Intact	ATGC
351	JF425945	JF425955	Intact	Intact	ATGC
352	JF425946	JF425955	Intact	Intact	ATGC
353	JF425947	JF425955	Intact	Intact	ATGC
354	JF425948	JF425955	Intact	Intact	ATGC
355	JF425949	JF425955	Intact	Intact	ATGC
356	JF425950	JF425955	Intact	Intact	ATGC
357	JF425951	JF425955	Intact	Intact	ATGC
358	JF425952	JF425955	Intact	Intact	ATGC
359	JF425953	JF425955	Intact	Intact	ATGC
360	JF425954	JF425955	Intact	Intact	ATGC
361	JF425980	Representative	Intact	Intact	ATGC
362	JF425956	JF425980	Intact	Intact	ATGC
363	JF425957	JF425980	Intact	Intact	ATGC
364	JF425958	JF425980	Intact	Intact	ATGC
365	JF425959	JF425980	Intact	Intact	ATGC
366	JF425960	JF425980	Intact	Intact	ATGC
367	JF425961	JF425980	Intact	Intact	ATGC
368	JF425962	JF425980	Intact	Intact	ATGC
369	JF425963	JF425980	Intact	Intact	ATGC
370	JF425964	JF425980	Intact	Intact	ATGC
371	JF425965	JF425980	Intact	Intact	ATGC
372	JF425966	JF425980	Intact	Intact	ATGC
373	JF425968	JF425980	Intact	Intact	ATGC
374	JF425969	JF425980	Intact	Intact	ATGC
375	JF425970	JF425980	Intact	Intact	ATGC
376	JF425971	JF425980	Intact	Intact	ATGC
377	JF425972	JF425980	Intact	Intact	ATGC
378	JF425973	JF425980	Intact	Intact	ATGC
379	JF425974	JF425980	Intact	Intact	ATGC
380	JF425975	JF425980	Intact	Intact	ATGC
381	JF425976	JF425980	Intact	Intact	ATGC
382	JF425977	JF425980	Intact	Intact	ATGC
383	JF425978	JF425980	Intact	Intact	ATGC
384	JF425979	JF425980	Intact	Intact	ATGC
385	JF425989	Representative	Intact	Intact	ATGC
386	JF425990	JF425989	Intact	Intact	ATGC
387	JF425991	JF425989	Intact	Intact	ATGC
388	JF425992	JF425989	Intact	Intact	ATGC
389	JF425993	JF425989	Intact	Intact	ATGC
390	JF425994	JF425989	Intact	Intact	ATGC
391	JF425995	JF425989	Intact	Intact	ATGC
392	JF425996	JF425989	Intact	Intact	ATGC
393	JF425997	JF425989	Intact	Intact	ATGC
394	JF425998	JF425989	Intact	Intact	ATGC
395	JF426000	JF425989	Intact	Intact	ATGC
396	JF426001	JF425989	Intact	Intact	ATGC
397	JF426002	JF425989	Intact	Intact	ATGC
398	JF426003	JF425989	Intact	Intact	ATGC
399	JF425988	JF425989	Intact	Intact	ATGC
400	JF425987	JF425989	Intact	Intact	ATGC
401	JF425986	JF425989	Intact	Intact	ATGC
402	JF425985	JF425989	Intact	Intact	ATGC
403	JF425984	JF425989	Intact	Intact	ATGC
404	JF425983	JF425989	Intact	Intact	ATGC
405	JF425982	JF425989	Intact	Intact	ATGC
406	JF425981	JF425989	Intact	Intact	ATGC
407	JF426025	JF425989	Intact	Missing	ATGC
408	JF426026	Representative	Intact	Missing	ATGC
409	JF426004	JF426026	Intact	Missing	ATGC
410	JF426005	JF426026	Intact	Missing	ATGC
411	JF426006	JF426026	Intact	Missing	ATGC
412	JF426007	JF426026	Intact	Missing	ATGC
413	JF426008	JF426026	Intact	Missing	ATGC
414	JF426009	JF426026	Intact	Missing	ATGC
415	JF426010	JF426026	Intact	Missing	ATGC
416	JF426011	JF426026	Intact	Missing	ATGC
417	JF426012	JF426026	Intact	Missing	ATGC
418	JF426013	JF426026	Intact	Missing	ATGC
419	JF426014	JF426026	Intact	Missing	ATGC
420	JF426015	JF426026	Intact	Missing	ATGC
421	JF426016	JF426026	Intact	Missing	ATGC
422	JF426017	JF426026	Intact	Missing	ATGC
423	JF426018	JF426026	Intact	Missing	ATGC
424	JF426019	JF426026	Intact	Missing	ATGC
425	JF426020	JF426026	Intact	Missing	ATGC
426	JF426021	JF426026	Intact	Missing	ATGC
427	JF426022	JF426026	Intact	Missing	ATGC
428	JF426023	JF426026	Intact	Missing	ATGC
429	JF426024	JF426026	Intact	Missing	ATGC
430	JF424893	Representative	Intact	Intact	ATGC
431	JF424874	JF424893	Intact	Intact	ATGC
432	JF424875	JF424893	Intact	Intact	ATGC
433	JF424877	JF424893	Intact	Intact	ATGC
434	JF424878	JF424893	Intact	Intact	ATGC
435	JF424879	JF424893	Intact	Intact	ATGC
436	JF424880	JF424893	Intact	Intact	ATGC
437	JF424881	JF424893	Intact	Intact	ATGC
438	JF424882	JF424893	Intact	Intact	ATGC
439	JF424883	JF424893	Intact	Intact	ATGC
440	JF424884	JF424893	Intact	Intact	ATGC
441	JF424885	JF424893	Intact	Intact	ATGC
442	JF424886	JF424893	Intact	Intact	ATGC
443	JF424887	JF424893	Intact	Intact	ATGC
444	JF424888	JF424893	Intact	Intact	ATGC
445	JF424889	JF424893	Intact	Intact	ATGC
446	JF424890	JF424893	Intact	Intact	ATGC
447	JF424891	JF424893	Intact	Intact	ATGC
448	JF424892	JF424893	Intact	Intact	ATGC
449	JF425680	JF424893	Intact	Missing	ATGC
450	JF425692	JF424893	Intact	Missing	ATGC
451	JF425694	Representative	Intact	Missing	ATGC
452	JF425673	JF425694	Intact	Missing	ATGC
453	JF425674	JF425694	Intact	Missing	ATGC
454	JF425676	JF425694	Intact	Missing	ATGC
455	JF425677	JF425694	Intact	Missing	ATGC
456	JF425678	JF425694	Intact	Missing	ATGC
457	JF425679	JF425694	Intact	Missing	ATGC
458	JF425681	JF425694	Intact	Missing	ATGC
459	JF425682	JF425694	Intact	Missing	ATGC
460	JF425683	JF425694	Intact	Missing	ATGC
461	JF425685	JF425694	Intact	Missing	ATGC
462	JF425686	JF425694	Intact	Missing	ATGC
463	JF425688	JF425694	Intact	Missing	ATGC
464	JF425689	JF425694	Intact	Missing	ATGC
465	JF425690	JF425694	Intact	Missing	ATGC
466	JF425691	JF425694	Intact	Missing	ATGC
467	JF425693	JF425694	Intact	Missing	ATGC
468	D00805	Representative	Intact	Intact	ATGC
469	AB127344	D00805	Intact	Intact	ATGC
470	AB127345	D00805	Intact	Intact	ATGC
471	AB127346	D00805	Intact	Intact	ATGC
472	AB127347	D00805	Intact	Intact	ATGC
473	AB127348	D00805	Intact	Intact	ATGC
474	AB127349	D00805	Intact	Intact	ATGC
475	AB127350	D00805	Intact	Intact	ATGC
476	AB127351	D00805	Intact	Intact	ATGC
477	AF044719	D00805	Intact	Intact	ATGC
478	JF424834	D00805	Intact	Intact	ATGC
479	JF424835	D00805	Intact	Intact	ATGC
480	D00804	D00805	Intact	Intact	ATGC
481	JF425601	D00805	Intact	Missing	ATGC
482	JF425602	D00805	Intact	Missing	ATGC
483	JF425603	D00805	Intact	Missing	ATGC
484	JF425604	D00805	Intact	Missing	ATGC
485	JF425605	D00805	Intact	Missing	ATGC
486	JF425606	D00805	Intact	Missing	ATGC
487	JF425607	D00805	Intact	Missing	ATGC
488	JF425608	D00805	Intact	Missing	ATGC
489	JF425609	D00805	Intact	Missing	ATGC
490	JF425610	D00805	Intact	Missing	ATGC
491	JF425611	D00805	Intact	Missing	ATGC
492	JF425612	D00805	Intact	Missing	ATGC
493	JF425613	D00805	Intact	Missing	ATGC
494	JF425614	D00805	Intact	Missing	ATGC
495	JF425615	D00805	Intact	Missing	ATGC
496	JF425616	D00805	Intact	Missing	ATGC
497	JF425617	D00805	Intact	Missing	ATGC
498	JF425620	D00805	Intact	Missing	ATGC
499	JF425621	D00805	Intact	Missing	ATGC
500	JF425622	D00805	Intact	Missing	ATGC
501	JF425623	D00805	Intact	Missing	ATGC
502	JF425624	D00805	Intact	Missing	ATGC
503	JF425625	D00805	Intact	Missing	ATGC
504	JF425626	D00805	Intact	Missing	ATGC
505	JF425629	D00805	Intact	Missing	ATGC
506	JF425630	D00805	Intact	Missing	ATGC
507	JF425632	D00805	Intact	Missing	ATGC
508	JF425633	D00805	Intact	Missing	ATGC
509	JF425634	D00805	Intact	Missing	ATGC
510	JF425635	D00805	Intact	Missing	ATGC
511	JF425636	D00805	Intact	Missing	ATGC
512	JF425637	D00805	Intact	Missing	ATGC
513	JF425638	D00805	Intact	Missing	ATGC
514	JF425639	D00805	Intact	Missing	ATGC
515	JF425759	D00805	Intact	Missing	ATGC
516	JF425760	D00805	Intact	Missing	ATGC
517	JF425761	D00805	Intact	Missing	ATGC
518	JF425762	D00805	Intact	Missing	ATGC
519	JF425763	D00805	Intact	Missing	ATGC
520	JF425764	D00805	Intact	Missing	ATGC
521	JF425765	D00805	Intact	Missing	ATGC
522	JF425766	D00805	Intact	Missing	ATGC
523	JF425767	D00805	Intact	Missing	ATGC
524	JF425768	D00805	Intact	Missing	ATGC
525	JF425769	D00805	Intact	Missing	ATGC
526	JF425770	D00805	Intact	Missing	ATGC
527	JF424950	Representative	Intact	Intact	ATGC
528	JF424911	JF424950	Intact	Intact	ATGC
529	JF424912	JF424950	Intact	Intact	ATGC
530	JF424913	JF424950	Intact	Intact	ATGC
531	JF424914	JF424950	Intact	Intact	ATGC
532	JF424915	JF424950	Intact	Intact	ATGC
533	JF424916	JF424950	Intact	Intact	ATGC
534	JF424917	JF424950	Intact	Intact	ATGC
535	JF424918	JF424950	Intact	Intact	ATGC
536	JF424919	JF424950	Intact	Intact	ATGC
537	JF424920	JF424950	Intact	Intact	ATGC
538	JF424921	JF424950	Intact	Intact	ATGC
539	JF424922	JF424950	Intact	Intact	ATGC
540	JF424923	JF424950	Intact	Intact	ATGC
541	JF424924	JF424950	Intact	Intact	ATGC
542	JF424925	JF424950	Intact	Intact	ATGC
543	JF424926	JF424950	Intact	Intact	ATGC
544	JF424927	JF424950	Intact	Intact	ATGC
545	JF424928	JF424950	Intact	Intact	ATGC
546	JF424929	JF424950	Intact	Intact	ATGC
547	JF424930	JF424950	Intact	Intact	ATGC
548	JF424931	JF424950	Intact	Intact	ATGC
549	JF424932	JF424950	Intact	Intact	ATGC
550	JF424933	JF424950	Intact	Intact	ATGC
551	JF424934	JF424950	Intact	Intact	ATGC
552	JF424935	JF424950	Intact	Intact	ATGC
553	JF424936	JF424950	Intact	Intact	ATGC
554	JF424937	JF424950	Intact	Intact	ATGC
555	JF424938	JF424950	Intact	Intact	ATGC
556	JF424939	JF424950	Intact	Intact	ATGC
557	JF424940	JF424950	Intact	Intact	ATGC
558	JF424941	JF424950	Intact	Intact	ATGC
559	JF424942	JF424950	Intact	Intact	ATGC
560	JF424943	JF424950	Intact	Intact	ATGC
561	JF424944	JF424950	Intact	Intact	ATGC
562	JF424945	JF424950	Intact	Intact	ATGC
563	JF424946	JF424950	Intact	Intact	ATGC
564	JF424947	JF424950	Intact	Intact	ATGC
565	JF424948	JF424950	Intact	Intact	ATGC
566	JF424949	JF424950	Intact	Intact	ATGC
567	JF424951	JF424950	Intact	Intact	ATGC
568	JF424952	JF424950	Intact	Intact	ATGC
569	JF424953	JF424950	Intact	Intact	ATGC
570	JF424954	JF424950	Intact	Intact	ATGC
571	JF424955	JF424950	Intact	Intact	ATGC
572	JF425771	JF424950	Intact	Missing	ATGC
573	JF425772	JF424950	Intact	Missing	ATGC
574	JF425773	JF424950	Intact	Missing	ATGC
575	JF425774	JF424950	Intact	Missing	ATGC
576	JF425775	JF424950	Intact	Missing	ATGC
577	JF425776	JF424950	Intact	Missing	ATGC
578	JF425777	JF424950	Intact	Missing	ATGC
579	JF425778	JF424950	Intact	Missing	ATGC
580	JF425779	JF424950	Intact	Missing	ATGC
581	JF425782	JF424950	Intact	Missing	ATGC
582	JF425783	JF424950	Intact	Missing	ATGC
583	JF425784	JF424950	Intact	Missing	ATGC
584	JF425785	JF424950	Intact	Missing	ATGC
585	JF425786	JF424950	Intact	Missing	ATGC
586	JF425787	JF424950	Intact	Missing	ATGC
587	JF425790	JF424950	Intact	Missing	ATGC
588	JF425792	JF424950	Intact	Missing	ATGC
589	JF425793	JF424950	Intact	Missing	ATGC
590	JF425794	JF424950	Intact	Missing	ATGC
591	JF425796	JF424950	Intact	Missing	ATGC
592	JF425797	JF424950	Intact	Missing	ATGC
593	JF425798	JF424950	Intact	Missing	ATGC
594	JF425799	JF424950	Intact	Missing	ATGC
595	JF425800	JF424950	Intact	Missing	ATGC
596	JF425821	Representative	Intact	Missing	ATGC
597	JF425801	JF425821	Intact	Missing	ATGC
598	JF425802	JF425821	Intact	Missing	ATGC
599	JF425803	JF425821	Intact	Missing	ATGC
600	JF425804	JF425821	Intact	Missing	ATGC
601	JF425805	JF425821	Intact	Missing	ATGC
602	JF425806	JF425821	Intact	Missing	ATGC
603	JF425807	JF425821	Intact	Missing	ATGC
604	JF425808	JF425821	Intact	Missing	ATGC
605	JF425810	JF425821	Intact	Missing	ATGC
606	JF425811	JF425821	Intact	Missing	ATGC
607	JF425812	JF425821	Intact	Missing	ATGC
608	JF425813	JF425821	Intact	Missing	ATGC
609	JF425814	JF425821	Intact	Missing	ATGC
610	JF425815	JF425821	Intact	Missing	ATGC
611	JF425817	JF425821	Intact	Missing	ATGC
612	JF425818	JF425821	Intact	Missing	ATGC
613	JF425819	JF425821	Intact	Missing	ATGC
614	JF425820	JF425821	Intact	Missing	ATGC
615	JF425841	Representative	Intact	Intact	ATGC
616	JF424956	JF425841	Intact	Intact	ATGC
617	JF424957	JF425841	Intact	Intact	ATGC
618	JF424958	JF425841	Intact	Intact	ATGC
619	JF424959	JF425841	Intact	Intact	ATGC
620	JF424960	JF425841	Intact	Intact	ATGC
621	JF424961	JF425841	Intact	Intact	ATGC
622	JF424962	JF425841	Intact	Intact	ATGC
623	JF425822	JF425841	Intact	Intact	ATGC
624	JF425823	JF425841	Intact	Intact	ATGC
625	JF425824	JF425841	Intact	Intact	ATGC
626	JF425825	JF425841	Intact	Intact	ATGC
627	JF425826	JF425841	Intact	Intact	ATGC
628	JF425827	JF425841	Intact	Intact	ATGC
629	JF425828	JF425841	Intact	Intact	ATGC
630	JF425829	JF425841	Intact	Intact	ATGC
631	JF425830	JF425841	Intact	Intact	ATGC
632	JF425831	JF425841	Intact	Intact	ATGC
633	JF425832	JF425841	Intact	Intact	ATGC
634	JF425833	JF425841	Intact	Intact	ATGC
635	JF425834	JF425841	Intact	Intact	ATGC
636	JF425835	JF425841	Intact	Intact	ATGC
637	JF425836	JF425841	Intact	Intact	ATGC
638	JF425837	JF425841	Intact	Intact	ATGC
639	JF425838	JF425841	Intact	Intact	ATGC
640	JF425840	JF425841	Intact	Intact	ATGC
641	JF425864	Representative	Intact	Intact	ATGC
642	JF424894	JF425864	Intact	Intact	ATGC
643	JF424895	JF425864	Intact	Intact	ATGC
644	JF424896	JF425864	Intact	Intact	ATGC
645	JF424897	JF425864	Intact	Intact	ATGC
646	JF424898	JF425864	Intact	Intact	ATGC
647	JF424899	JF425864	Intact	Intact	ATGC
648	JF424900	JF425864	Intact	Intact	ATGC
649	JF424901	JF425864	Intact	Intact	ATGC
650	JF424904	JF425864	Intact	Intact	ATGC
651	JF424905	JF425864	Intact	Intact	ATGC
652	JF424906	JF425864	Intact	Intact	ATGC
653	JF424907	JF425864	Intact	Intact	ATGC
654	JF424908	JF425864	Intact	Intact	ATGC
655	JF424909	JF425864	Intact	Intact	ATGC
656	JF424910	JF425864	Intact	Intact	ATGC
657	JF425842	JF425864	Intact	Intact	ATGC
658	JF425843	JF425864	Intact	Intact	ATGC
659	JF425844	JF425864	Intact	Intact	ATGC
660	JF425845	JF425864	Intact	Intact	ATGC
661	JF425846	JF425864	Intact	Intact	ATGC
662	JF425847	JF425864	Intact	Intact	ATGC
663	JF425848	JF425864	Intact	Intact	ATGC
664	JF425849	JF425864	Intact	Intact	ATGC
665	JF425850	JF425864	Intact	Intact	ATGC
666	JF425851	JF425864	Intact	Intact	ATGC
667	JF425852	JF425864	Intact	Intact	ATGC
668	JF425853	JF425864	Intact	Intact	ATGC
669	JF425854	JF425864	Intact	Intact	ATGC
670	JF425855	JF425864	Intact	Intact	ATGC
671	JF425856	JF425864	Intact	Intact	ATGC
672	JF425857	JF425864	Intact	Intact	ATGC
673	JF425858	JF425864	Intact	Intact	ATGC
674	JF425859	JF425864	Intact	Intact	ATGC
675	JF425860	JF425864	Intact	Intact	ATGC
676	JF425861	JF425864	Intact	Intact	ATGC
677	JF425862	JF425864	Intact	Intact	ATGC
678	JF424903	JF425864	Intact	Intact	ATGC
679	JF424902	JF425864	Intact	Intact	ATGC
680	JF426079	JF425864	Intact	Missing	ATGC
681	JF426070	JF425864	Intact	Missing	ATGC
682	JF426071	JF425864	Intact	Missing	ATGC
683	JF426072	JF425864	Intact	Missing	ATGC
684	JF426074	JF425864	Intact	Missing	ATGC
685	JF426075	JF425864	Intact	Missing	ATGC
686	JF426076	JF425864	Intact	Missing	ATGC
687	JF426077	JF425864	Intact	Missing	ATGC
688	JF426078	JF425864	Intact	Missing	ATGC
689	JF425934	Representative	Intact	Intact	ATGC
690	JF425933	JF425934	Intact	Intact	ATGC
691	JF425927	JF425934	Intact	Intact	ATGC
692	JF425921	JF425934	Intact	Intact	ATGC
693	JF425915	JF425934	Intact	Intact	ATGC
694	JF425909	JF425934	Intact	Intact	ATGC
695	JF425903	JF425934	Intact	Intact	ATGC
696	JF425897	JF425934	Intact	Intact	ATGC
697	JF425890	JF425934	Intact	Intact	ATGC
698	JF425885	JF425934	Intact	Intact	ATGC
699	JF425879	JF425934	Intact	Intact	ATGC
700	JF425872	JF425934	Intact	Intact	ATGC
701	JF425865	JF425934	Intact	Intact	ATGC
702	JF425932	JF425934	Intact	Intact	ATGC
703	JF425926	JF425934	Intact	Intact	ATGC
704	JF425920	JF425934	Intact	Intact	ATGC
705	JF425914	JF425934	Intact	Intact	ATGC
706	JF425908	JF425934	Intact	Intact	ATGC
707	JF425902	JF425934	Intact	Intact	ATGC
708	JF425896	JF425934	Intact	Intact	ATGC
709	JF425889	JF425934	Intact	Intact	ATGC
710	JF425884	JF425934	Intact	Intact	ATGC
711	JF425878	JF425934	Intact	Intact	ATGC
712	JF425870	JF425934	Intact	Intact	ATGC
713	JF425931	JF425934	Intact	Intact	ATGC
714	JF425925	JF425934	Intact	Intact	ATGC
715	JF425919	JF425934	Intact	Intact	ATGC
716	JF425913	JF425934	Intact	Intact	ATGC
717	JF425907	JF425934	Intact	Intact	ATGC
718	JF425901	JF425934	Intact	Intact	ATGC
719	JF425894	JF425934	Intact	Intact	ATGC
720	JF425888	JF425934	Intact	Intact	ATGC
721	JF425883	JF425934	Intact	Intact	ATGC
722	JF425877	JF425934	Intact	Intact	ATGC
723	JF425869	JF425934	Intact	Intact	ATGC
724	JF425929	JF425934	Intact	Intact	ATGC
725	JF425923	JF425934	Intact	Intact	ATGC
726	JF425917	JF425934	Intact	Intact	ATGC
727	JF425911	JF425934	Intact	Intact	ATGC
728	JF425905	JF425934	Intact	Intact	ATGC
729	JF425899	JF425934	Intact	Intact	ATGC
730	JF425892	JF425934	Intact	Intact	ATGC
731	JF425887	JF425934	Intact	Intact	ATGC
732	JF425881	JF425934	Intact	Intact	ATGC
733	JF425875	JF425934	Intact	Intact	ATGC
734	JF425867	JF425934	Intact	Intact	ATGC
735	JF425930	JF425934	Intact	Intact	ATGC
736	JF425924	JF425934	Intact	Intact	ATGC
737	JF425918	JF425934	Intact	Intact	ATGC
738	JF425912	JF425934	Intact	Intact	ATGC
739	JF425906	JF425934	Intact	Intact	ATGC
740	JF425900	JF425934	Intact	Intact	ATGC
741	JF425893	JF425934	Intact	Intact	ATGC
742	JF425895	JF425934	Intact	Intact	ATGC
743	JF425882	JF425934	Intact	Intact	ATGC
744	JF425876	JF425934	Intact	Intact	ATGC
745	JF425868	JF425934	Intact	Intact	ATGC
746	JF425928	JF425934	Intact	Intact	ATGC
747	JF425922	JF425934	Intact	Intact	ATGC
748	JF425916	JF425934	Intact	Intact	ATGC
749	JF425910	JF425934	Intact	Intact	ATGC
750	JF425904	JF425934	Intact	Intact	ATGC
751	JF425898	JF425934	Intact	Intact	ATGC
752	JF425891	JF425934	Intact	Intact	ATGC
753	JF425886	JF425934	Intact	Intact	ATGC
754	JF425880	JF425934	Intact	Intact	ATGC
755	JF425874	JF425934	Intact	Intact	ATGC
756	JF425866	JF425934	Intact	Intact	ATGC
757	JF426068	Representative	Intact	Intact	ATGC
758	JF426050	JF426068	Intact	Intact	ATGC
759	JF426051	JF426068	Intact	Intact	ATGC
760	JF426052	JF426068	Intact	Intact	ATGC
761	JF426053	JF426068	Intact	Intact	ATGC
762	JF426054	JF426068	Intact	Intact	ATGC
763	JF426055	JF426068	Intact	Intact	ATGC
764	JF426056	JF426068	Intact	Intact	ATGC
765	JF426057	JF426068	Intact	Intact	ATGC
766	JF426058	JF426068	Intact	Intact	ATGC
767	JF426059	JF426068	Intact	Intact	ATGC
768	JF426060	JF426068	Intact	Intact	ATGC
769	JF426061	JF426068	Intact	Intact	ATGC
770	JF426062	JF426068	Intact	Intact	ATGC
771	JF426063	JF426068	Intact	Intact	ATGC
772	JF426064	JF426068	Intact	Intact	ATGC
773	JF426065	JF426068	Intact	Intact	ATGC
774	JF426066	JF426068	Intact	Intact	ATGC
775	JF426067	JF426068	Intact	Intact	ATGC
776	JF426049	JF426068	Intact	Intact	ATGC
777	JF426048	JF426068	Intact	Intact	ATGC
778	JF426047	JF426068	Intact	Intact	ATGC
779	JF426046	JF426068	Intact	Intact	ATGC
780	JF425560	JF426068	Intact	Missing	ATGC
781	JF425561	JF426068	Intact	Missing	ATGC
782	JF425564	JF426068	Intact	Missing	ATGC
783	JF425565	JF426068	Intact	Missing	ATGC
784	JF425566	JF426068	Intact	Missing	ATGC
785	JF425567	JF426068	Intact	Missing	ATGC
786	JF425568	JF426068	Intact	Missing	ATGC
787	JF425569	JF426068	Intact	Missing	ATGC
788	JF425570	JF426068	Intact	Missing	ATGC
789	JF425571	JF426068	Intact	Missing	ATGC
790	JF425575	JF426068	Intact	Missing	ATGC
791	JF425576	JF426068	Intact	Missing	ATGC
792	JF425577	JF426068	Intact	Missing	ATGC
793	JF425578	JF426068	Intact	Missing	ATGC
794	JF425579	JF426068	Intact	Missing	ATGC
795	JF425580	JF426068	Intact	Missing	ATGC
796	JF425581	JF426068	Intact	Missing	ATGC
797	JF425582	JF426068	Intact	Missing	ATGC
798	JF425583	JF426068	Intact	Missing	ATGC
799	JF425584	JF426068	Intact	Missing	ATGC
800	JF425585	JF426068	Intact	Missing	ATGC
801	JF425586	JF426068	Intact	Missing	ATGC
802	JF425587	JF426068	Intact	Missing	ATGC
803	JF425588	JF426068	Intact	Missing	ATGC
804	JF425589	JF426068	Intact	Missing	ATGC
805	JF425591	JF426068	Intact	Missing	ATGC
806	JF425592	JF426068	Intact	Missing	ATGC
807	JF425593	JF426068	Intact	Missing	ATGC
808	JF425594	JF426068	Intact	Missing	ATGC
809	JF425595	JF426068	Intact	Missing	ATGC
810	JF425596	JF426068	Intact	Missing	ATGC
811	JF425598	JF426068	Intact	Missing	ATGC
812	JF425599	JF426068	Intact	Missing	ATGC
813	JF425600	JF426068	Intact	Missing	ATGC
814	JF426108	Representative	Intact	Intact	ATGC
815	JF424836	JF426108	Intact	Intact	ATGC
816	JF424837	JF426108	Intact	Intact	ATGC
817	JF424838	JF426108	Intact	Intact	ATGC
818	JF424839	JF426108	Intact	Intact	ATGC
819	JF424840	JF426108	Intact	Intact	ATGC
820	JF424841	JF426108	Intact	Intact	ATGC
821	JF424842	JF426108	Intact	Intact	ATGC
822	JF424843	JF426108	Intact	Intact	ATGC
823	JF424844	JF426108	Intact	Intact	ATGC
824	JF424845	JF426108	Intact	Intact	ATGC
825	JF424846	JF426108	Intact	Intact	ATGC
826	JF424847	JF426108	Intact	Intact	ATGC
827	JF424848	JF426108	Intact	Intact	ATGC
828	JF424849	JF426108	Intact	Intact	ATGC
829	JF424850	JF426108	Intact	Intact	ATGC
830	JF424851	JF426108	Intact	Intact	ATGC
831	JF424852	JF426108	Intact	Intact	ATGC
832	JF424853	JF426108	Intact	Intact	ATGC
833	JF424854	JF426108	Intact	Intact	ATGC
834	JF424855	JF426108	Intact	Intact	ATGC
835	JF424856	JF426108	Intact	Intact	ATGC
836	JF424857	JF426108	Intact	Intact	ATGC
837	JF424858	JF426108	Intact	Intact	ATGC
838	JF424859	JF426108	Intact	Intact	ATGC
839	JF424860	JF426108	Intact	Intact	ATGC
840	JF424861	JF426108	Intact	Intact	ATGC
841	JF424862	JF426108	Intact	Intact	ATGC
842	JF424863	JF426108	Intact	Intact	ATGC
843	JF424864	JF426108	Intact	Intact	ATGC
844	JF424865	JF426108	Intact	Intact	ATGC
845	JF424866	JF426108	Intact	Intact	ATGC
846	JF424867	JF426108	Intact	Intact	ATGC
847	JF424868	JF426108	Intact	Intact	ATGC
848	JF424869	JF426108	Intact	Intact	ATGC
849	JF424870	JF426108	Intact	Intact	ATGC
850	JF424871	JF426108	Intact	Intact	ATGC
851	JF424872	JF426108	Intact	Intact	ATGC
852	JF424873	JF426108	Intact	Intact	ATGC
853	JF426080	JF426108	Intact	Intact	ATGC
854	JF426081	JF426108	Intact	Intact	ATGC
855	JF426082	JF426108	Intact	Intact	ATGC
856	JF426083	JF426108	Intact	Intact	ATGC
857	JF426084	JF426108	Intact	Intact	ATGC
858	JF426085	JF426108	Intact	Intact	ATGC
859	JF426086	JF426108	Intact	Intact	ATGC
860	JF426087	JF426108	Intact	Intact	ATGC
861	JF426088	JF426108	Intact	Intact	ATGC
862	JF426089	JF426108	Intact	Intact	ATGC
863	JF426090	JF426108	Intact	Intact	ATGC
864	JF426091	JF426108	Intact	Intact	ATGC
865	JF426092	JF426108	Intact	Intact	ATGC
866	JF426093	JF426108	Intact	Intact	ATGC
867	JF426094	JF426108	Intact	Intact	ATGC
868	JF426095	JF426108	Intact	Intact	ATGC
869	JF426096	JF426108	Intact	Intact	ATGC
870	JF426097	JF426108	Intact	Intact	ATGC
871	JF426098	JF426108	Intact	Intact	ATGC
872	JF426099	JF426108	Intact	Intact	ATGC
873	JF426100	JF426108	Intact	Intact	ATGC
874	JF426101	JF426108	Intact	Intact	ATGC
875	JF426102	JF426108	Intact	Intact	ATGC
876	JF426103	JF426108	Intact	Intact	ATGC
877	JF426104	JF426108	Intact	Intact	ATGC
878	JF426105	JF426108	Intact	Intact	ATGC
879	JF426106	JF426108	Intact	Intact	ATGC
880	JF426107	JF426108	Intact	Intact	ATGC
881	JF425641	JF426108	Intact	Missing	ATGC
882	JF425642	JF426108	Intact	Missing	ATGC
883	JF425643	JF426108	Intact	Missing	ATGC
884	JF425644	JF426108	Intact	Missing	ATGC
885	JF425645	JF426108	Intact	Missing	ATGC
886	JF425646	JF426108	Intact	Missing	ATGC
887	JF425647	JF426108	Intact	Missing	ATGC
888	JF425648	JF426108	Intact	Missing	ATGC
889	JF425649	JF426108	Intact	Missing	ATGC
890	JF425650	JF426108	Intact	Missing	ATGC
891	JF425651	JF426108	Intact	Missing	ATGC
892	JF425652	JF426108	Intact	Missing	ATGC
893	JF425653	JF426108	Intact	Missing	ATGC
894	JF425654	JF426108	Intact	Missing	ATGC
895	JF425655	JF426108	Intact	Missing	ATGC
896	JF425656	JF426108	Intact	Missing	ATGC
897	JF425657	JF426108	Intact	Missing	ATGC
898	JF425658	JF426108	Intact	Missing	ATGC
899	JF425659	JF426108	Intact	Missing	ATGC
900	JF425660	JF426108	Intact	Missing	ATGC
901	JF425661	JF426108	Intact	Missing	ATGC
902	JF425662	JF426108	Intact	Missing	ATGC
903	JF425663	JF426108	Intact	Missing	ATGC
904	JF425664	JF426108	Intact	Missing	ATGC
905	JF425665	JF426108	Intact	Missing	ATGC
906	JF425666	JF426108	Intact	Missing	ATGC
907	JF425667	JF426108	Intact	Missing	ATGC
908	JF425669	JF426108	Intact	Missing	ATGC
909	JF425670	JF426108	Intact	Missing	ATGC
910	JF425671	JF426108	Intact	Missing	ATGC
911	JF425672	JF426108	Intact	Missing	ATGC
912	JF426110	JF426108	Intact	Missing	ATGC
913	JF426111	JF426108	Intact	Missing	ATGC
914	JF426112	JF426108	Intact	Missing	ATGC
915	JF426113	JF426108	Intact	Missing	ATGC
916	JF426114	JF426108	Intact	Missing	ATGC
917	JF426115	JF426108	Intact	Missing	ATGC
918	JF426116	JF426108	Intact	Missing	ATGC
919	JF426117	JF426108	Intact	Missing	ATGC
920	JF426118	JF426108	Intact	Missing	ATGC
921	D00808	Representative	Intact	Intact	ATGC
922	AB038251	D00808	Intact	Intact	ATGC
923	D61698	D00808	Intact	Intact	ATGC
924	JF425551	D00808	Intact	Intact	ATGC
925	JF425552	D00808	Intact	Intact	ATGC
926	JF425553	D00808	Intact	Intact	ATGC
927	JF425554	D00808	Intact	Intact	ATGC
928	JF425555	D00808	Intact	Intact	ATGC
929	JF425556	D00808	Intact	Intact	ATGC
930	JF426119	D00808	Intact	Missing	ATGC
931	JF426120	D00808	Intact	Missing	ATGC
932	JF426121	D00808	Intact	Missing	ATGC
933	JF426122	D00808	Intact	Missing	ATGC
934	JF426123	D00808	Intact	Missing	ATGC
935	JF426124	D00808	Intact	Missing	ATGC
936	JF426125	D00808	Intact	Missing	ATGC
937	JF426126	D00808	Intact	Missing	ATGC
938	JF426128	D00808	Intact	Missing	ATGC
939	JF426129	D00808	Intact	Missing	ATGC
940	JF426130	D00808	Intact	Missing	ATGC
941	JF426131	D00808	Intact	Missing	ATGC
942	JF426132	D00808	Intact	Missing	ATGC
943	JF426133	D00808	Intact	Missing	ATGC
944	JF426134	D00808	Intact	Missing	ATGC
945	JF426135	D00808	Intact	Missing	ATGC
946	NC_001699	Representative	Intact	Intact	ATGC
947	J02226	NC_001699	Intact	Intact	ATGC
948	JF425699	NC_001699	Intact	Missing	ATGC
949	JF425700	NC_001699	Intact	Missing	ATGC
950	JF425701	NC_001699	Intact	Missing	ATGC
951	JF425702	NC_001699	Intact	Missing	ATGC
952	JF425703	NC_001699	Intact	Missing	ATGC
953	JF425704	NC_001699	Intact	Missing	ATGC
954	JF425705	NC_001699	Intact	Missing	ATGC
955	JF425706	NC_001699	Intact	Missing	ATGC
956	JF425707	NC_001699	Intact	Missing	ATGC
957	JF425708	NC_001699	Intact	Missing	ATGC
958	JF425709	NC_001699	Intact	Missing	ATGC
959	JF425710	NC_001699	Intact	Missing	ATGC
960	JF425711	NC_001699	Intact	Missing	ATGC
961	JF425712	NC_001699	Intact	Missing	ATGC
962	JF425713	NC_001699	Intact	Missing	ATGC
963	JF425714	NC_001699	Intact	Missing	ATGC
964	JF425716	NC_001699	Intact	Missing	ATGC
965	JF425717	NC_001699	Intact	Missing	ATGC
966	JF425718	NC_001699	Intact	Missing	ATGC
967	JF425719	NC_001699	Intact	Missing	ATGC
968	JF425720	NC_001699	Intact	Missing	ATGC
969	JF425721	NC_001699	Intact	Missing	ATGC
970	JF425722	NC_001699	Intact	Missing	ATGC
971	JF425723	NC_001699	Intact	Missing	ATGC
972	JF425724	NC_001699	Intact	Missing	ATGC
973	JF425725	NC_001699	Intact	Missing	ATGC
974	JF425726	NC_001699	Intact	Missing	ATGC
975	JF425727	NC_001699	Intact	Missing	ATGC
976	JF425728	NC_001699	Intact	Missing	ATGC
977	JF425729	NC_001699	Intact	Missing	ATGC
978	JF425730	NC_001699	Intact	Missing	ATGC
979	JF425731	NC_001699	Intact	Missing	ATGC
980	JF425732	NC_001699	Intact	Missing	ATGC
981	JF425733	NC_001699	Intact	Missing	ATGC
982	JF425734	NC_001699	Intact	Missing	ATGC
983	JF425695	NC_001699	Intact	Missing	ATGC
984	JF425696	NC_001699	Intact	Missing	ATGC
985	JF425697	NC_001699	Intact	Missing	ATGC
986	JF425698	NC_001699	Intact	Missing	ATGC
987	D00802	Representative	Intact	Intact	ATGC
988	HF955443	D00802	Intact	Intact	ATGC
989	AF203616	D00802	Intact	Intact	ATGC
990	AF300952	D00802	Intact	Intact	ATGC
991	AF300953	D00802	Intact	Intact	ATGC
992	AF300954	D00802	Intact	Intact	ATGC
993	AF300955	D00802	Intact	Intact	ATGC
994	AF300960	D00802	Intact	Intact	ATGC
995	AF300961	D00802	Intact	Intact	ATGC
996	AF300962	D00802	Intact	Intact	ATGC
997	AF300963	D00802	Intact	Intact	ATGC
998	AF300964	D00802	Intact	Intact	ATGC
999	AB038249	Representative	Intact	Intact	ATGC
1000	D00803	AB038249	Intact	Intact	ATGC
1001	D10281	AB038249	Intact	Intact	ATGC
1002	AF300945	AB038249	Intact	Intact	ATGC
1003	AF300946	AB038249	Intact	Intact	ATGC
1004	AF300947	AB038249	Intact	Intact	ATGC
1005	AF300948	AB038249	Intact	Intact	ATGC
1006	AF300949	AB038249	Intact	Intact	ATGC
1007	AF300950	AB038249	Intact	Intact	ATGC
1008	AF300951	AB038249	Intact	Intact	ATGC
1009	AF300957	AB038249	Intact	Intact	ATGC
1010	AF300967	AB038249	Intact	Intact	ATGC
1011	AF363830	AB038249	Intact	Intact	ATGC
1012	AF363831	AB038249	Intact	Intact	ATGC
1013	HM038523	AB038249	Intact	Intact	ATGC
1014	M35834	AB038249	Intact	Intact	ATGC
1015	JF425557	AB038249	Intact	Missing	ATGC
1016	DQ114942	None	Intact	Intact	ATGC and "N"
1017	AY083212	None	Intact	Intact	ATGC and "N"
1018	AY083213	None	Intact	Intact	ATGC and "N"
1019	JF425735	None	Intact	Missing	ATGC and "Y"
1020	JF425559	None	Intact	Missing	ATGC and "M"
1021	AF030122	None	Intact	Missing	ATGC and "N"
1022	AF030127	None	Intact	Missing	ATGC and "N"
1023	AF030114	None	Intact	Missing	ATGC and "N"
1024	AF030115	None	Intact	Missing	ATGC and "N"
