# Supplementary material for: Database and Statistical Analyses of Transcription Factor Binding Sites in the Non-Coding Control Region of JC Virus
Source: Viruses. 2021 Nov 19;13(11):2314. doi: 10.3390/v13112314 (PMC8620444; doi:10.3390/v13112314)
Supplement: Supplementary file 1 [file viruses-13-02314-s001.zip › Supplementary Dataset S2.xlsx]

## Sheet: Supplementary Dataset S2_Legend
Database and statistical analyses of transcription factor binding sites in the non-coding control region of JC virus
Kazuo Nakamichi and Toshio Shimokawa
Supplementary Dataset S2. Types of specimens and health conditions of individuals in which JCV NCCR sequences were detected.
After data cleansing and removal of duplicated identical sequences, 223 out of 1024 NCCR sequences were extracted.
The origin of each NCCR was queried from the metadata of nucleotide sequences as described in the main text.
TFBS matrices were simulated using the MatInspector for NCCR sequences of JCV derived from the urine of healthy individuals and CSF of PML patients.

## Sheet: Supplementary Dataset S2_Data
Consecutive number	Accession number	Host	Sample	MatInspector analysis
1	AB008765	Healthy individual	Urine	Yes
2	AB038249	Healthy individual	Urine	Yes
3	AB038252	Healthy individual	Urine	Yes
4	AB038253	Healthy individual	Urine	Yes
5	AB127342	Healthy individual	Urine	Yes
6	AB127343	Healthy individual	Urine	Yes
7	AB127352	Healthy individual	Urine	Yes
8	AB127353	Healthy individual	Urine	Yes
9	AF203609	Healthy individual	Urine	Yes
10	AF203611	Healthy individual	Urine	Yes
11	AF203612	Healthy individual	Urine	Yes
12	AF203614	Healthy individual	Urine	Yes
13	AF203617	Healthy individual	Urine	Yes
14	AF320317	Healthy individual	Urine	Yes
15	AF320318	Healthy individual	Urine	Yes
16	AY364314	Healthy individual	Urine	Yes
17	AY376829	Healthy individual	Urine	Yes
18	AY382184	Healthy individual	Urine	Yes
19	D49987	Healthy individual	Urine	Yes
20	D49991	Healthy individual	Urine	Yes
21	D49992	Healthy individual	Urine	Yes
22	D49994	Healthy individual	Urine	Yes
23	D49996	Healthy individual	Urine	Yes
24	D49998	Healthy individual	Urine	Yes
25	D61696	Healthy individual	Urine	Yes
26	D61697	Healthy individual	Urine	Yes
27	D61699	Healthy individual	Urine	Yes
28	D61700	Healthy individual	Urine	Yes
29	D61702	Healthy individual	Urine	Yes
30	FJ233070	Healthy individual	Urine	Yes
31	HF955438	Healthy individual	Urine	Yes
32	HF955439	Healthy individual	Urine	Yes
33	HF955440	Healthy individual	Urine	Yes
34	HF955441	Healthy individual	Urine	Yes
35	D61701	Healthy individual	Urine	Yes
36	D00802	Healthy individual	Urine	Yes
37	D49995	Healthy individual	Urine	Yes
38	HF955445	Healthy individual	Urine	Yes
39	HF955446	Healthy individual	Urine	Yes
40	HF955447	Healthy individual	Urine	Yes
41	HF955448	Healthy individual	Urine	Yes
42	HF955449	Healthy individual	Urine	Yes
43	HF955450	Healthy individual	Urine	Yes
44	D00807	Healthy individual	Urine	Yes
45	D00808	Healthy individual	Urine	Yes
46	D00801	Healthy individual	Urine	Yes
47	D00805	Healthy individual	Urine	Yes
48	D00806	Healthy individual	Urine	Yes
49	D49997	Healthy individual	Urine	Yes
50	AB003029	PML patient	CSF	Yes
51	AB003030	PML patient	CSF	Yes
52	AB006366	PML patient	CSF	Yes
53	AB006367	PML patient	CSF	Yes
54	AB006369	PML patient	CSF	Yes
55	AB699038	PML patient	CSF	Yes
56	AB699041	PML patient	CSF	Yes
57	AB699042	PML patient	CSF	Yes
58	AB699043	PML patient	CSF	Yes
59	AB699044	PML patient	CSF	Yes
60	AB699045	PML patient	CSF	Yes
61	AB699046	PML patient	CSF	Yes
62	AB699047	PML patient	CSF	Yes
63	AB699049	PML patient	CSF	Yes
64	AB699050	PML patient	CSF	Yes
65	AB699051	PML patient	CSF	Yes
66	AB699052	PML patient	CSF	Yes
67	AB699053	PML patient	CSF	Yes
68	AB699055	PML patient	CSF	Yes
69	AB699057	PML patient	CSF	Yes
70	AB699058	PML patient	CSF	Yes
71	AB699059	PML patient	CSF	Yes
72	AB699060	PML patient	CSF	Yes
73	AB699061	PML patient	CSF	Yes
74	AB699062	PML patient	CSF	Yes
75	AB699064	PML patient	CSF	Yes
76	AB699065	PML patient	CSF	Yes
77	AB699067	PML patient	CSF	Yes
78	AB699068	PML patient	CSF	Yes
79	AB699069	PML patient	CSF	Yes
80	AB699071	PML patient	CSF	Yes
81	AB699072	PML patient	CSF	Yes
82	AB699073	PML patient	CSF	Yes
83	AB699075	PML patient	CSF	Yes
84	AB699076	PML patient	CSF	Yes
85	AB699077	PML patient	CSF	Yes
86	AB699078	PML patient	CSF	Yes
87	AB699079	PML patient	CSF	Yes
88	AB699080	PML patient	CSF	Yes
89	AB699081	PML patient	CSF	Yes
90	AB699082	PML patient	CSF	Yes
91	AB699083	PML patient	CSF	Yes
92	AB699084	PML patient	CSF	Yes
93	AB699085	PML patient	CSF	Yes
94	AB699087	PML patient	CSF	Yes
95	AB699088	PML patient	CSF	Yes
96	AF258303	PML patient	CSF	Yes
97	AF258304	PML patient	CSF	Yes
98	AF258305	PML patient	CSF	Yes
99	AF258306	PML patient	CSF	Yes
100	AF258307	PML patient	CSF	Yes
101	AF258310	PML patient	CSF	Yes
102	AF258311	PML patient	CSF	Yes
103	AF258312	PML patient	CSF	Yes
104	AF258313	PML patient	CSF	Yes
105	AF258314	PML patient	CSF	Yes
106	AF258315	PML patient	CSF	Yes
107	AY536239	PML patient	CSF	Yes
108	AY536240	PML patient	CSF	Yes
109	AY536241	PML patient	CSF	Yes
110	AY536242	PML patient	CSF	Yes
111	DQ104099	PML patient	CSF	Yes
112	DQ114930	PML patient	CSF	Yes
113	DQ114931	PML patient	CSF	Yes
114	DQ114932	PML patient	CSF	Yes
115	DQ114933	PML patient	CSF	Yes
116	DQ114934	PML patient	CSF	Yes
117	DQ114935	PML patient	CSF	Yes
118	DQ114936	PML patient	CSF	Yes
119	DQ114938	PML patient	CSF	Yes
120	DQ114939	PML patient	CSF	Yes
121	DQ114940	PML patient	CSF	Yes
122	DQ114941	PML patient	CSF	Yes
123	DQ250720	PML patient	CSF	Yes
124	DQ250721	PML patient	CSF	Yes
125	DQ250722	PML patient	CSF	Yes
126	DQ250723	PML patient	CSF	Yes
127	DQ250724	PML patient	CSF	Yes
128	DQ250725	PML patient	CSF	Yes
129	DQ250726	PML patient	CSF	Yes
130	DQ250728	PML patient	CSF	Yes
131	DQ250729	PML patient	CSF	Yes
132	HM038527	PML patient	CSF	Yes
133	HM038528	PML patient	CSF	Yes
134	HM038529	PML patient	CSF	Yes
135	HM038530	PML patient	CSF	Yes
136	HM038531	PML patient	CSF	Yes
137	HM038532	PML patient	CSF	Yes
138	HM038533	PML patient	CSF	Yes
139	AB699089	PML patient	CSF	Yes
140	DQ250719	PML patient	CSF	Yes
141	NC_001699	PML patient	Brain	No
142	AB003027	PML patient	Brain	No
143	AB038254	PML patient	Brain	No
144	AB038255	PML patient	Brain	No
145	AB183708	PML patient	Brain	No
146	AF015538	PML patient	Brain	No
147	AF047456	PML patient	Brain	No
148	D26584	PML patient	Brain	No
149	D26585	PML patient	Brain	No
150	D26588	PML patient	Brain	No
151	D12574	PML patient	Brain	No
152	D12575	PML patient	Brain	No
153	D12576	PML patient	Brain	No
154	D12577	PML patient	Brain	No
155	D12578	PML patient	Brain	No
156	AF004350	PML patient	Brain	No
157	EU747351	PML patient	Bone Marrow	No
158	EU747352	PML patient	Bone Marrow	No
159	EU747354	PML patient	Plasma	No
160	AF004349	PML patient	Kidney	No
161	AF258308	PML patient	Unknown	No
162	AY536243	PML patient	Unknown	No
163	HM038524	PML patient	Unknown	No
164	HM038526	PML patient	Unknown	No
165	JF424876	PML patient	Unknown	No
166	JF424893	PML patient	Unknown	No
167	JF424950	PML patient	Unknown	No
168	JF425504	PML patient	Unknown	No
169	JF425839	PML patient	Unknown	No
170	JF425841	PML patient	Unknown	No
171	JF425863	PML patient	Unknown	No
172	JF425864	PML patient	Unknown	No
173	JF425871	PML patient	Unknown	No
174	JF425873	PML patient	Unknown	No
175	JF425934	PML patient	Unknown	No
176	JF425955	PML patient	Unknown	No
177	JF425980	PML patient	Unknown	No
178	JF425989	PML patient	Unknown	No
179	JF426031	PML patient	Unknown	No
180	JF426040	PML patient	Unknown	No
181	JF426043	PML patient	Unknown	No
182	JF426045	PML patient	Unknown	No
183	JF426068	PML patient	Unknown	No
184	JF426069	PML patient	Unknown	No
185	JF426108	PML patient	Unknown	No
186	JF426109	PML patient	Unknown	No
187	HM038525	PML patient	Unknown	No
188	AF064547	Patient without PML	Brain	No
189	AF352161	Patient without PML	Renal cells	No
190	AF048698	Patient without PML	Unknown	No
191	AF044717	Patient without PML	Unknown	No
192	AF044718	Patient without PML	Unknown	No
193	AF044714	Patient without PML	Unknown	No
194	AF044715	Patient without PML	Unknown	No
195	AF044716	Patient without PML	Unknown	No
196	AY050521	Immunocompromised patient without PML	Urine	No
197	D10284	Immunocompromised patient without PML	Urine	No
198	D10286	Immunocompromised patient without PML	Urine	No
199	D10283	Immunocompromised patient without PML	Urine	No
200	D10285	Immunocompromised patient without PML	Urine	No
201	AF300956	Unknown	Urine	No
202	U73178	Unknown	Urine	No
203	AF300958	Unknown	Urine	No
204	AF300959	Unknown	Urine	No
205	AF300965	Unknown	Urine	No
206	AF300966	Unknown	Urine	No
207	AF533310	Unknown	Sewage	No
208	AY083211	Unknown	Sewage	No
209	AF532778	Unknown	Sewage	No
210	AF532779	Unknown	Sewage	No
211	AF533308	Unknown	Sewage	No
212	AF533309	Unknown	Sewage	No
213	AF533311	Unknown	Sewage	No
214	AF533312	Unknown	Sewage	No
215	AF533313	Unknown	Sewage	No
216	AF218438	Unknown	Unknown	No
217	AF218440	Unknown	Unknown	No
218	AF218441	Unknown	Unknown	No
219	AF218442	Unknown	Unknown	No
220	AF218443	Unknown	Unknown	No
221	AF218444	Unknown	Unknown	No
222	AY386378	Unknown	Unknown	No
223	AF218439	Unknown	Unknown	No
