# Supplementary material for: Database and Statistical Analyses of Transcription Factor Binding Sites in the Non-Coding Control Region of JC Virus
Source: Viruses. 2021 Nov 19;13(11):2314. doi: 10.3390/v13112314 (PMC8620444; doi:10.3390/v13112314)
Supplement: Supplementary file 1 [file viruses-13-02314-s001.zip › Supplementary Dataset S3.xlsx]

## Sheet: Supplementary Dataset S3_Legend
Database and statistical analyses of transcription factor binding sites in the non-coding control region of JC virus
Kazuo Nakamichi and Toshio Shimokawa
Supplementary Dataset S3. Transcription factor binding site (TFBS) matrices in JCV NCCRs for which statistical analyses were performed.
Among the TFBSs identified by MatInspector, 52 highly conserved matrices in the NCCR of archetype JCV isolates were used for statistical analyses as described in the Results section.
Possession rates of each TFBS matrix in the NCCR sequences of JCV detected in the urine of healthy individuals (healthy) and CSF of PML patients (PML) were statistically compared in the same way as in Table 1.
In the column of HGNC IDs for transcription factors, “NA” is noted if the information provided by MatInspector for the matrix is not the name of the transcription factor (box or element) or if the gene could not be found in the HGNC database.
Abbreviations: BH-FDR, Significance using Benjamini-Hochberg false discovery rate.

## Sheet: Supplementary Dataset S3_Data
Consecutive number	Matrix name	DNA Strand	Possession rate (healthy)	Possession rate (PML)	P-value	BH-FDR	Transcription factor	HGNC ID
1	V$ZBTB3.01	Forward	95.9	64.8	<0.0001	Significant	Zinc finger and BTB domain containing 3	22918
2	V$FOXJ3.01	Forward	98	68.1	<0.0001	Significant	Forkhead box J3	29178
3	V$CRX.01	Forward	98	37.4	<0.0001	Significant	Cone-rod homeobox	2383
4	V$NKX61.01	Forward	98	37.4	<0.0001	Significant	NK6 homeobox 1	7839
5	V$PDX1.01	Forward	98	36.3	<0.0001	Significant	Pancreatic and duodenal homeobox 1	6107
6	V$HOXC10.01	Forward	98	29.7	<0.0001	Significant	Homeobox C10	5122
7	V$IRF1.01	Forward	95.9	22	<0.0001	Significant	Interferon regulatory factor 1	6116
8	V$MIF1.01	Forward	95.9	20.9	<0.0001	Significant	HIVEP zinc finger 2 / regulatory factor X1	4921 / 9982
9	V$BRN5.03	Forward	98	39.6	<0.0001	Significant	POU class 6 homeobox 1	9224
10	V$PLAGL1.01	Forward	98	33	<0.0001	Significant	PLAG1 like zinc finger 1	9046
11	V$SPI1.02	Forward	100	87.9	0.0083	Significant	Spi-1 proto-oncogene	11241
12	V$IRF7.01	Forward	100	89	0.0148	Significant	Interferon regulatory factor 7	6122
13	V$MZF1.02	Forward	100	89	0.0148	Significant	Myeloid zinc finger 1	13108
14	V$TP63.01	Forward	95.9	84.6	0.053	Not significant	Tumor protein p63	15979
15	V$SOX9.02	Forward	100	93.4	0.091	Not significant	SRY-box transcription factor 9	11204
16	V$NF1.01	Forward	98	89	0.0967	Not significant	Nuclear factor I	7784, 7785, 7786, 7788
17	V$BARBIE.01	Forward	98	91.2	0.1608	Not significant	Barbiturate-inducible element	NA
18	V$NF1.03	Forward	100	95.6	0.2975	Not significant	Nuclear factor I	7784, 7785, 7786, 7788
19	V$GC.01	Forward	95.9	90.1	0.3286	Not significant	GC box elements	NA
20	O$PTATA.02	Forward	100	97.8	0.5417	Not significant	Plant TATA box	NA
21	O$SPT15.01	Forward	100	97.8	0.5417	Not significant	TATA-box binding protein	11588
22	V$SALL1.01	Forward	100	97.8	0.5417	Not significant	Spalt like transcription factor 1	10524
23	V$SOX3.01	Forward	100	97.8	0.5417	Not significant	SRY-box transcription factor 3	11199
24	V$SPIB.01	Forward	100	96.7	0.5517	Not significant	Spi-B transcription factor	11242
25	V$HIC1.01	Forward	100	96.7	0.5517	Not significant	HIC ZBTB transcriptional repressor 1	4909
26	O$PTATA.01	Forward	100	98.9	1	Not significant	Plant TATA box	NA
27	O$VTATA.01	Forward	100	98.9	1	Not significant	Cellular and viral TATA box elements	NA
28	V$LEF1.01	Forward	98	97.8	1	Not significant	Lymphoid enhancer binding factor 1	6551
29	V$SOX6.01	Forward	98	97.8	1	Not significant	SRY-box transcription factor 6	16421
30	V$OLIG2.01	Forward	100	100	1	Not significant	Oligodendrocyte transcription factor 2	9398
31	V$GKLF.01	Forward	100	100	1	Not significant	Kruppel like factor 4	6348
32	V$XFD2.01	Forward	100	98.9	1	Not significant	Forkhead box protein I1-A (Xenopus laevis)	NA
33	V$NFY.03	Forward	100	100	1	Not significant	Nuclear transcription factor Y subunit alpha	7804
34	V$NF1.04	Forward	100	100	1	Not significant	Nuclear factor I	7784, 7785, 7786, 7788
35	V$SMARCA3.02	Reverse	98	60.4	<0.0001	Significant	Helicase like transcription factor	11099
36	V$HOXC9.01	Reverse	98	36.3	<0.0001	Significant	Homeobox C9	5130
37	V$MEIS1.03	Reverse	98	36.3	<0.0001	Significant	Meis homeobox 1	7000
38	V$CMYB.02	Reverse	95.9	25.3	<0.0001	Significant	MYB proto-oncogene, transcription factor	7545
39	V$ZNF232.01	Reverse	98	35.2	<0.0001	Significant	Zinc finger protein 232	13026
40	V$PLAGL1.01	Reverse	98	33	<0.0001	Significant	PLAG1 like zinc finger 1	9046
41	V$ROAZ.01	Reverse	98	30.8	<0.0001	Significant	Zinc finger protein 423	16762
42	V$ZBTB3.01	Reverse	95.9	35.2	<0.0001	Significant	Zinc finger and BTB domain containing 3	22918
43	V$PRDM4.01	Reverse	100	87.9	0.0083	Significant	PR/SET domain 4	9348
44	V$CREB3L2.01	Reverse	98	86.8	0.0334	Not significant	cAMP responsive element binding protein 3 like 2	23720
45	V$FOXP1_ES.01	Reverse	95.9	98.9	0.2803	Not significant	Forkhead box P1 (alternative splicing variant)	3823
46	V$ZNF263.02	Reverse	95.9	91.2	0.4939	Not significant	Zinc finger protein 263	13056
47	O$PTATA.02	Reverse	100	97.8	0.5417	Not significant	Plant TATA box	NA
48	O$SPT15.01	Reverse	100	97.8	0.5417	Not significant	TATA-box binding protein	11588
49	V$NF1.01	Reverse	100	97.8	0.5417	Not significant	Nuclear factor I	7784, 7785, 7786, 7788
50	V$PAX6.01	Reverse	95.9	96.7	1	Not significant	Paired box 6	8620
51	V$PAX9.02	Reverse	95.9	96.7	1	Not significant	Paired box 9	8623
52	V$NF1.04	Reverse	100	100	1	Not significant	Nuclear factor I	7784, 7785, 7786, 7788
