# Supplementary material for: Database and Statistical Analyses of Transcription Factor Binding Sites in the Non-Coding Control Region of JC Virus
Source: Viruses. 2021 Nov 19;13(11):2314. doi: 10.3390/v13112314 (PMC8620444; doi:10.3390/v13112314)
Supplement: Supplementary file 1 [file viruses-13-02314-s001.zip › Supplementary Dataset S4.xlsx]

## Sheet: Supplementary Dataset S4_Legend
Database and statistical analyses of transcription factor binding sites in the non-coding control region of JC virus
Kazuo Nakamichi and Toshio Shimokawa
Supplementary Dataset S4. Actual DNA sequences and counterparts of TFBSs in JCV NCCR.
The DNA sequences of the TFBSs in the NCCR of JCV CY strain are listed. These include the TFBSs presented in Fig. 2 as well as other Figures and Tables.
Capital letters indicate the core sequence of the respective TFBS.
The nucleotide number of each TFBS indicates its position on the genomic DNA of JCV CY strain (GenBank: AB038249.1).
The gene names and IDs of the transcription factors were checked using the HGNC database based on the metadata presented in MatInspector.
In the column of HGNC IDs for transcription factors, “NA” is noted if the information provided by MatInspector for the matrix is not the name of the transcription factor (box or element) or if the gene could not be found in the HGNC database.
If transcription factors belonging to the same family (e.g. NFIA, NFIB, NFIC, NFID) bind to a particular TFBS, multiple HGNC IDs are listed.

## Sheet: Supplementary Dataset S4_Data
Consecutive number	DNA strand	Matrix name	DNA sequence	Nucleotide number	Transcription factor	HGNC ID
1	Forward	O$PTATA.01	tataTATAaaaaaaa	15..29	Plant TATA box	NA
2	Forward	O$PTATA.02	cctgTATAtataaaa	11..25	Plant TATA box	NA
3	Forward	O$PTATA.02	tgtaTATAtaaaaaa	13..27	Plant TATA box	NA
4	Forward	O$SPT15.01	tcctgtaTATAtaaaaa	10..26	TATA-box binding protein	11588
5	Forward	O$VTATA.01	ctgtaTATAtaaaaaaa	12..28	Cellular and viral TATA box elements	NA
6	Forward	O$VTATA.01	gtataTATAaaaaaaag	14..30	Cellular and viral TATA box elements	NA
7	Forward	O$VTATA.01	atataTAAAaaaaaggg	16..32	Cellular and viral TATA box elements	NA
8	Forward	V$ATOH1.01	caacCAGCtgaca	99..111	Atonal bHLH transcription factor 1	797
9	Forward	V$BARBIE.01	aaacAAAGcacaagg	184..198	Barbiturate-inducible element	NA
10	Forward	V$BRN5.03	tTAATcacaagtaaacaaagcac	172..194	POU class 6 homeobox 1	9224
11	Forward	V$CRX.01	gtcctTAATcacaagta	168..184	Cone-rod homeobox	2383
12	Forward	V$FOXJ3.01	cacaagTAAAcaaagca	177..193	Forkhead box J3	29178
13	Forward	V$GC.01	aggtagGGAGgagctgg	34..50	GC box elements	NA
14	Forward	V$GKLF.01	atatataaaaaaAAGGg	16..32	Kruppel like factor 4	6348
15	Forward	V$GKLF.01	taaaaaaaagggAAGGt	21..37	Kruppel like factor 4	6348
16	Forward	V$GRHL2.01	ccAACCagctgac	98..110	Grainyhead like transcription factor 2	2799
17	Forward	V$GRHL3.01	ggaacaTGTTttg	219..231	Grainyhead like transcription factor 3	25839
18	Forward	V$HIC1.01	ggcTGCCagccaa	63..75	HIC ZBTB transcriptional repressor 1	4909
19	Forward	V$HOXC10.01	catagtccTTAAtcaca	164..180	Homeobox C10	5122
20	Forward	V$IRF1.01	ctggcagttatagtGAAAcccctcc	139..163	Interferon regulatory factor 1	6116
21	Forward	V$IRF7.01	cacaagggGAAGtggaaagcagcca	192..216	Interferon regulatory factor 7	6122
22	Forward	V$IRX5.01	ggaaCATGttttg	219..231	Iroquois homeobox 5	14361
23	Forward	V$LEF1.01	aagtaaaCAAAgcacaa	180..196	Lymphoid enhancer binding factor 1	6551
24	Forward	V$MIF1.01	gcagttatagtGAAAcccc	142..160	HIVEP zinc finger 2 / regulatory factor X1	4921 / 9982
25	Forward	V$MZF1.02	aaGGGGaagtg	195..205	Myeloid zinc finger 1	13108
26	Forward	V$NF1.01	gttTTGGcttgtcaccagctg	244..264	Nuclear factor I	7784, 7785, 7786, 7788
27	Forward	V$NF1.03	aaactggatggctGCCAgcca	54..74	Nuclear factor I	7784, 7785, 7786, 7788
28	Forward	V$NF1.04	tggatggctgccagCCAAgca	58..78	Nuclear factor I	7784, 7785, 7786, 7788
29	Forward	V$NF1.04	gccctggctgcatgCCACtgg	122..142	Nuclear factor I	7784, 7785, 7786, 7788
30	Forward	V$NF1.04	gaagtggaaagcagCCAGggg	200..220	Nuclear factor I	7784, 7785, 7786, 7788
31	Forward	V$NFY.03	ccagCCAAgcatgag	68..82	Nuclear transcription factor Y subunit alpha	7804
32	Forward	V$NFY.03	ggagCCAAccagctg	94..108	Nuclear transcription factor Y subunit alpha	7804
33	Forward	V$NKX61.01	gtccTTAAtcacaag	168..182	NK6 homeobox 1	7839
34	Forward	V$OLIG2.01	tcaccaGCTGgcc	255..267	Oligodendrocyte transcription factor 2	9398
35	Forward	V$P53.03	aagcagccaggggaaCATGttttgc	208..232	Tumor protein p53 (3' half site)	11998
36	Forward	V$PDX1.01	catagtcctTAATcacaag	164..182	Pancreatic and duodenal homeobox 1	6107
37	Forward	V$PLAGL1.01	agaggGAGCcctggctgcatgcc	115..137	PLAG1 like zinc finger 1	9046
38	Forward	V$PRDM5.01	agggaaggtAGGGaggagctggctaaaac	29..57	PR/SET domain 5	9349
39	Forward	V$RFX1.02	aagcagccaggGGAAcatg	208..226	Regulatory factor X1	9982
40	Forward	V$SALL1.01	atATAAaaaaaag	18..30	Spalt like transcription factor 1	10524
41	Forward	V$SOX3.01	ataaaaAAAAgggaaggtaggga	20..42	SRY-box transcription factor 3	11199
42	Forward	V$SOX6.01	agtaaACAAagcacaaggggaag	181..203	SRY-box transcription factor 6	16421
43	Forward	V$SOX9.02	aaagcACAAggggaagtggaaag	188..210	SRY-box transcription factor 9	11204
44	Forward	V$SPI1.02	gcacaaggGGAAgtggaaagc	191..211	Spi-1 proto-oncogene	11241
45	Forward	V$SPIB.01	aaaaaaagGGAAggtagggag	23..43	Spi-B transcription factor	11242
46	Forward	V$TBX20.02	agggagccaaccagctGACAgccagaggg	92..120	T-box transcription factor 20	11598
47	Forward	V$TCF21.01	gagccagaGCTGttttg	233..249	Transcription factor 21	11632
48	Forward	V$TCFCP2L1.01	agCTGGctaaaactggatg	45..63	Transcription factor CP2 like 1	17925
49	Forward	V$TGIF2LX.01	caaccagctGACAgcca	99..115	TGFB induced factor homeobox 2 like X-linked	18570
50	Forward	V$TP63.01	ccagagctgttttggCTTGtcacca	236..260	Tumor protein p63	15979
51	Forward	V$XFD2.01	tatataTAAAaaaaagg	15..31	Forkhead box protein I1-A (Xenopus laevis)	NA
52	Forward	V$ZBTB3.01	gacaGCCAgag	108..118	Zinc finger and BTB domain containing 3	22918
53	Forward	V$ZBTB3.01	agcaGCCAggg	209..219	Zinc finger and BTB domain containing 3	22918
54	Forward	V$ZBTB7.03	tgaaaCCCCtcccatagtcctta	152..174	Zinc finger and BTB domain containing 7A	18078
55	Reverse	O$PTATA.02	ttttTATAtatacag	complement(12..26)	Plant TATA box	NA
56	Reverse	O$SPT15.01	ttttttaTATAtacagg	complement(11..27)	TATA-box binding protein	11588
57	Reverse	O$SPT15.01	tttttttTATAtataca	complement(13..29)	TATA-box binding protein	11588
58	Reverse	V$AP4.02	gctgtcAGCTggttggc	complement(97..113)	Activator protein 4	NA
59	Reverse	V$CKROX.01	ctatGGGAggggtttcact	complement(150..168)	Zinc finger and BTB domain containing 7B	18668
60	Reverse	V$CMYB.02	gtttcactaTAACtgccagtg	complement(137..157)	MYB proto-oncogene, transcription factor	7545
61	Reverse	V$CREB3L2.01	agctggtGACAagccaaaaca	complement(243..263)	cAMP responsive element binding protein 3 like 2	23720
62	Reverse	V$E2F.02	ctggctcgcAAAAcatg	complement(223..239)	E2F transcription factor	3113, 3114, 3115, 3118, 3119, 3120, 23820, 24727
63	Reverse	V$E2F.03	ctctgGCTCgcaaaaca	complement(225..241)	E2F transcription factor	3113, 3114, 3115, 3118, 3119, 3120, 23820, 24727
64	Reverse	V$EBF1.01	acatgtTCCCctggctgctttcc	complement(205..227)	EBF transcription factor	3126
65	Reverse	V$FOXP1_ES.01	ctcgcaaAACAtgttcc	complement(219..235)	Forkhead box P1 (alternative splicing variant)	3823
66	Reverse	V$FOXP1_ES.01	aagccaaAACAgctctg	complement(237..253)	Forkhead box P1 (alternative splicing variant)	3823
67	Reverse	V$GC.01	actatgGGAGgggtttc	complement(153..169)	GC box elements	NA
68	Reverse	V$GRE.03	ctcgcaaaacaTGTTcccc	complement(217..235)	Glucocorticoid responsive elements	NA
69	Reverse	V$HOXC9.01	acttgtgaTTAAggact	complement(167..183)	Homeobox C9	5130
70	Reverse	V$INSM1.01	tgggaGGGGtttc	complement(153..165)	INSM transcriptional repressor 1	6090
71	Reverse	V$IRX5.01	aaaaCATGttccc	complement(218..230)	Iroquois homeobox 5	14361
72	Reverse	V$KLF7.01	tatgGGAGgggtttcac	complement(151..167)	Kruppel like factor 7	6350
73	Reverse	V$MAZ.01	atggGAGGggttt	complement(154..166)	MYC associated zinc finger protein	6914
74	Reverse	V$MEIS1.01	cctctggcTGTCagctg	complement(103..119)	Meis homeobox 1	7000
75	Reverse	V$MEIS1.03	cttgtGATTaaggacta	complement(166..182)	Meis homeobox 1	7000
76	Reverse	V$MYOD.01	ggctGTCAgctggttgg	complement(98..114)	Myogenic differentiation 1	7611
77	Reverse	V$NF1.01	tggCTGGcagccatccagttt	complement(54..74)	Nuclear factor I	7784, 7785, 7786, 7788
78	Reverse	V$NF1.01	cccCTGGctgctttccacttc	complement(200..220)	Nuclear factor I	7784, 7785, 7786, 7788
79	Reverse	V$NF1.04	tgcttggctggcagCCATcca	complement(58..78)	Nuclear factor I	7784, 7785, 7786, 7788
80	Reverse	V$NF1.04	ccagtggcatgcagCCAGggc	complement(122..142)	Nuclear factor I	7784, 7785, 7786, 7788
81	Reverse	V$NF1.04	cagctggtgacaagCCAAaac	complement(244..264)	Nuclear factor I	7784, 7785, 7786, 7788
82	Reverse	V$P53.03	ctctggctcgcaaaaCATGttcccc	complement(217..241)	Tumor protein p53 (3' half site)	11998
83	Reverse	V$PAX6.01	agctcATGCttggctggca	complement(66..84)	Paired box 6	8620
84	Reverse	V$PAX9.02	tgagctCATGcttggctggca	complement(66..86)	Paired box 9	8623
85	Reverse	V$PLAGL1.01	ccaggGCTCcctctggctgtcag	complement(106..128)	PLAG1 like zinc finger 1	9046
86	Reverse	V$PRDM4.01	gctgcTTTCcacttccccttgtgctttgt	complement(186..214)	PR/SET domain 4	9348
87	Reverse	V$PTF1.01	gtcaGCTGgttggctccctag	complement(90..110)	Pancreas associated transcription factor 1a	23734
88	Reverse	V$ROAZ.01	atGCAGccagggctccc	complement(118..134)	Zinc finger protein 423	16762
89	Reverse	V$SMARCA3.02	gtttACTTgtg	complement(177..187)	Helicase like transcription factor	11099
90	Reverse	V$TCFCP2L1.01	atCCAGttttagccagctc	complement(44..62)	Transcription factor CP2 like 1	17925
91	Reverse	V$TR4.02	ctccctAGGTatgagctcatgcttg	complement(73..97)	Nuclear receptor subfamily 2 group C member 2	7972
92	Reverse	V$XBOX.01	atgttccccTGGCtgcttt	complement(207..225)	Regulatory factor X	9982, 9983, 9984, 9985, 9986, 21478, 25777, 37253
93	Reverse	V$YY1.01	tggcagCCATccagttttagcca	complement(48..70)	YY1 transcription factor	12856
94	Reverse	V$ZBTB3.01	tgcaGCCAggg	complement(123..133)	Zinc finger and BTB domain containing 3	22918
95	Reverse	V$ZNF232.01	ttGTTTacttgtgattaag	complement(171..189)	Zinc finger protein 232	13026
96	Reverse	V$ZNF263.02	cagctcCTCCctacc	complement(35..49)	Zinc finger protein 263	13056
97	Reverse	V$ZNF410.02	gacTATGggaggggt	complement(156..170)	Zinc finger protein 410	20144
